# 1 Simulating rhizodeposition patterns around 2 growing and exuding root systems

3  
4 Magdalena Landl<sup>\*1</sup>, Adrian Hauptenthal<sup>1</sup>, Daniel Leitner<sup>2</sup>, Eva Kroener<sup>1,3</sup>,  
5 Doris Vetterlein<sup>4,5</sup>, Roland Bol<sup>1</sup>, Harry Vereecken<sup>1</sup>, Jan Vanderborght<sup>1</sup>, and  
6 Andrea Schnepf<sup>1</sup>

7 <sup>1</sup>Forschungszentrum Juelich GmbH, Agrosphere (IBG-3), Juelich, Germany

8 <sup>2</sup>Simulationswerkstatt, Ortmayrstrasse 20, A-4060 Leonding, Austria

9 <sup>3</sup>Institute of Crop Science and Resource Conservation (INRES), Soil Science  
10 and Soil Ecology, University Bonn, Bonn, Germany

11 <sup>4</sup>Department Soil System Sciences, Helmholtz Centre for Environmental  
12 Research-UFZ, Halle/Saale, Germany

13 <sup>5</sup>Martin-Luther-University Halle-Wittenberg; Institute of Agricultural and  
14 Nutritional Sciences, Halle/Saale, Germany

15  
16 \*Correspondence:

17 Magdalena Landl

18 Forschungszentrum Juelich GmbH, Agrosphere (IBG-3)

19 D- 52428 Juelich, Germany

20 Tel.: +49 2461 61 8835

21 Email: m.landl@fz-juelich.de

## 22 1 Abstract

23 In this study, we developed a novel model approach to compute the spatio-  
24 temporal distribution patterns of rhizodeposits around growing root systems  
25 in three dimensions. Root systems were generated using the root architecture  
26 model CPlantBox. The concentration of rhizodeposits at a given location in  
27 the soil domain was computed analytically. To simulate the spread of rhizode-  
28 posits in the soil, we considered rhizodeposit release from the roots, rhizodeposit  
29 diffusion into the soil, rhizodeposit sorption to soil particles, and rhizodeposit  
30 degradation by microorganisms. To demonstrate the capabilities of our new  
31 model approach, we performed simulations for the two example rhizodeposits  
32 mucilage and citrate and the two example root systems *Vicia faba* and *Zea*  
33 *mays*. The rhizodeposition model was parameterized using values from the  
34 literature. Our simulations showed that the rhizosphere soil volume with rhi-  
35 zodeposit concentrations above a defined threshold value (i.e., the rhizodeposit  
36 hotspot volume), exhibited a maximum at intermediate root growth rates. Root  
37 branching allowed the rhizospheres of individual roots to overlap, resulting in  
38 a greater volume of rhizodeposit hotspots. This was particularly important in  
39 the case of citrate, where overlap of rhizodeposition zones accounted for more  
40 than half of the total rhizodeposit hotspot volumes. The rhizodeposit hotspot  
41 volume around the tap root system *Vicia faba* was shown to be much larger  
42 than around the fibrous root system *Zea mays*. Coupling a root architecture

43 model with a rhizodeposition model allowed us to get a better understanding  
44 of the influence of root architecture as well as rhizodeposit properties on the  
45 evolution of the spatio-temporal distribution patterns of rhizodeposits around  
46 growing root systems.

## 47 2 Introduction

48 The rhizosphere is defined as the small soil volume around the roots, in which  
49 plant roots interact with the soil and thereby alter its physical, chemical and  
50 biological properties (Hinsinger et al., 2009). One important rhizosphere pro-  
51 cess is rhizodeposition, which is defined as the free or passive release of organic  
52 compounds by the root, including water-soluble exudates, secretion of insoluble  
53 materials and also enzymes such as acid phosphatase, and release of dead root  
54 cells (Cheng and Gershenson, 2007). Rhizodeposition affects the ability of plant  
55 roots to extract water and nutrients from the soil, which is particularly impor-  
56 tant when resources are scarce (Hinsinger et al., 2009). Knowledge about the  
57 spatial distribution of rhizodeposits in the soil domain is thus crucial (Darrah,  
58 1991).

59 There are only limited possibilities to directly measure the spatio-temporal  
60 distribution patterns of rhizodeposits around a root system. Holz et al. (2018a)  
61 used infrared spectroscopy to determine the spatial distribution of mucilage in  
62 the rhizosphere. This method allowed them to visualize the axial and radial gra-  
63 dients of mucilage concentration around a single root at a given point in time;  
64 information on the temporally dynamic distribution of mucilage is, however,  
65 lacking. Under the assumption of a constant ratio between rhizodeposited car-  
66 bon and root carbon, Pausch et al. (2013) quantified rhizodeposition at the field  
67 scale. This approach enabled them to estimate the total amount of rhizodeposi-  
68 tion of an entire root system over a defined period of time, however, it does not  
69 give any information about the spatial distribution patterns of rhizodeposits.

70 Simulation models can contribute to better understand the processes leading  
71 to rhizodeposition and its spatial and temporal distribution. Such models that  
72 describe the distribution of rhizodeposits in the soil domain need to take into ac-  
73 count the following processes: the rhizodeposit release by the roots, the diffusion  
74 of rhizodeposits into the soil domain, and the decomposition of rhizodeposits by  
75 microorganisms (Kirk, 1999). For some organic compounds such as citrate, also  
76 sorption to the soil particles plays an important role (Oburger et al., 2011). A  
77 common approach to dynamically compute rhizodeposition patterns in the soil  
78 domain is the use of the diffusion-reaction equation. To our knowledge, however,  
79 this approach has so far only been applied at the single root scale (Carminati  
80 et al., 2016a; Holz et al., 2018b; Kirk, 1999) or extrapolated from the single root  
81 scale to the root system scale, neglecting differences in rhizodeposition patterns  
82 along the root axis (Schnepf et al., 2012). Fletcher et al. (2020) used a citrate-  
83 phosphate solubilization model to compute the spatio-temporal distribution of  
84 citrate concentrations around root systems in three dimensions. Their approach  
85 is, however, limited to very small root systems ( $\leq 8\text{ cm}$  rooting depth) due to

86 computational limitations.

87 Various studies have shown the importance of the effect of root architecture  
88 on the amount and distribution of rhizodeposits (Hodge et al., 2009; Lynch,  
89 1995; Lynch, Ho, et al., 2005; Manschadi et al., 2014). On the one hand,  
90 root architecture controls the amount of rhizodeposit release by the number of  
91 root tips (Nielsen et al., 1994). On the other hand, root branching and root  
92 growth rate determine whether rhizodeposit release zones can overlap, thereby  
93 creating patches of high rhizodeposit concentration, which may facilitate water  
94 and nutrient uptake (De Parseval et al., 2017; Holz et al., 2018b).

95 Rhizodeposition was shown to affect rhizosphere processes such as water and  
96 nutrient acquisition only if its concentration exceeds a defined threshold value  
97 (i.e., the rhizodeposit hotspot concentration) (Ahmed et al., 2016; Fletcher et  
98 al., 2019; Gerke, 2015). However, it is not yet clear when and where around  
99 the growing root system such zones of rhizodeposit hotspot concentrations arise,  
100 how they are distributed, and what proportion of the total concentration volume  
101 they represent. Not only the location of a rhizodeposit hotspot, but also the dis-  
102 tance and connectivity to the nearest hotspot and its duration can be a relevant  
103 factor controlling soil microbial diversity and microbial activities (Carson et al.,  
104 2010). Certain bacteria respond to threats or nutrient availability even when  
105 detected from certain distances: volatile organic compounds can provide infor-  
106 mation over larger distances and diffusible compounds over smaller distances  
107 (Schulz-Bohm et al., 2017; Westhoff et al., 2017).

108 The aim of this study was to couple a root architecture model that simu-  
109 lates the development of a 3D root system with a rhizodeposition model that  
110 simulates the transport of rhizodeposits to investigate the spatio-temporal dis-  
111 tribution patterns of rhizodeposits in the soil and to evaluate the influence of  
112 root architecture on the generated patterns. For our simulations, we selected  
113 the two rhizodeposits citrate and mucilage, which have very distinct properties.  
114 In a first scenario, we simulated rhizodeposition by a single growing root. This  
115 scenario was used to evaluate the impact of the different rhizodeposit properties  
116 such as the rhizodeposit release rate, the sorption to soil particles as well as  
117 rhizodeposit decomposition and diffusion on the axial and radial distribution  
118 patterns of rhizodeposits around the root. In a second scenario, we investigated  
119 the impact of the two root architectural traits 'root growth rate' and 'number  
120 of root tips' on the rhizodeposition patterns around a growing single root re-  
121 spectively a simple herringbone root system. In a third scenario, we simulated  
122 rhizodeposition around entire growing root systems. For these simulations, we  
123 selected the tap and fibrous root systems of *Vicia faba* and *Zea mays*. This  
124 scenario was used to evaluate the impact of the different root architectures on  
125 the spatio-temporal distribution patterns of the rhizodeposits. For the root sys-  
126 tem of *Vicia faba*, we investigated for how long and where in the soil domain  
127 the rhizodeposit concentrations were above a critical threshold value and evalu-  
128 ated the importance of root branching and overlap of rhizodeposit release zones  
129 for the emergence of such rhizodeposit hotspots. Furthermore, we studied how  
130 the amount of soil volumes at various distances around rhizodeposit hotspots  
131 evolves over time.

## 132 3 Material and Methods

### 133 3.1 Model development

134 To simulate rhizodeposition patterns around growing and exuding root systems,  
135 we considered roots as point or line sources. The potential impact of the root  
136 diameter on the concentration of rhizodeposits was thus neglected. Making  
137 these assumptions, the concentration of rhizodeposits at a given location in  
138 the soil domain can be computed analytically. All equations and assumptions  
139 underlying our coupled model approach are explained in the following.

#### 140 3.1.1 Root growth model

141 All root systems were created with the root architecture model CPlantBox,  
142 which is described in detail in Schnepf et al. (2018) and Zhou et al. (2020).  
143 CPlantBox is a generic model, which allows simulating diverse root architectures  
144 of any monocotyledonous and dicotyledonous plant. It distinguishes between  
145 different root types, i.e. tap root, basal roots and lateral roots of different  
146 order. Each root type is defined by a certain set of parameters that determine  
147 its evolution over time. CPlantBox is programmed in C++, but includes a  
148 Python binding that allows simplified scripting.

#### 149 3.1.2 Rhizodeposition model - theory

150 For each growing root, we solve the diffusion-reaction equation (Jacques et al.,  
151 2018) in an infinite domain,

$$\theta R \frac{\partial c}{\partial t} + \nabla \cdot (-D\theta \nabla c) = -\theta k c + f(\mathbf{x}, t) \quad \text{for } t > 0, \mathbf{x} \in \mathbb{R}^3, \quad (1)$$

$$c(\mathbf{x}, 0) = 0 \quad (2)$$

152 where  $\theta$  is the volumetric water content ( $cm^3 cm^{-3}$ ),  $R$  is the retardation co-  
153 efficient ( $cm^3 cm^{-3}$ ),  $c$  is the rhizodeposit concentration in the soil ( $\mu g cm^{-3}$ ),  
154  $D = D_l \tau$  is the effective diffusion coefficient ( $cm^2 d^{-1}$ ),  $D_l$  is the molecular  
155 diffusion coefficient in water ( $cm^2 d^{-1}$ ),  $\tau$  is the impedance factor ( $-$ ),  $k$  is the  
156 linear first order decomposition rate constant ( $d^{-1}$ ),  $f$  is the source term that  
157 describes the release of rhizodeposits by the root at position  $\mathbf{x}$  and time  $t$ .

We consider two cases of rhizodeposition: In the first case, rhizodeposition  
occurs at the root tip only and the root is thus considered as a moving point  
source; in the second case, rhizodeposition occurs over a given root length  $l$   
behind the tip and the root is a moving line source. For these two cases, the  
source term  $f$  is defined as

$$f(\mathbf{x}, t)_{point} = Q_p \delta(\mathbf{x} - \mathbf{x}_{tip}(t)) \quad (3)$$

$$f(\mathbf{x}, t)_{line} = \int_0^{\min(t_r, l)} Q_l \delta(\mathbf{x} - \mathbf{x}(l', t)) dl' \quad (4)$$

158 where  $Q_p$  ( $\mu g d^{-1}$ ) and  $Q_l$  ( $\mu g d^{-1} cm^{-1}$ ) are the rhizodeposit release rates  
 159 of the point and line sources,  $\mathbf{x}_{tip}(t) = (x_{tip}, y_{tip}, z_{tip})$  is the position of root tip  
 160 at time  $t$ ,  $l_r$  is the arc length of the exuding root segment ( $cm$ ),  $\mathbf{x}(l', t)$  is the  
 161 position at an arc length of  $l'$  behind the position of the root tip at time  $t$ , and  
 162  $\delta(\mathbf{x})$  ( $cm^{-3}$ ) is the Dirac function.

The analytical solutions to these moving point and moving line source problems have been derived by Carslaw and Jaeger (1959), Bear and Cheng (2010), Wilson and Miller (1978):

$$c(\mathbf{x}, t) = \int_0^{age_r(t)} \frac{Q_p R^{1/2}}{8\theta\sqrt{\pi^3 D^3 t'^3}} \exp\left(-R \frac{(\mathbf{x} - \mathbf{x}_{tip}(age_r(t) - t'))^2}{4Dt'} - \frac{k}{R} t'\right) dt' \quad (5)$$

$$c(\mathbf{x}, t) = \int_0^{\min(l_r, l)} \int_0^{age_r(t)} \frac{Q_l R^{1/2}}{8\theta\sqrt{\pi^3 D^3 t'^3}} \exp\left(-R \frac{(\mathbf{x} - \mathbf{x}(l', age_r(t) - t'))^2}{4Dt'} - \frac{k}{R} t'\right) dt' dl', \quad (6)$$

163 where  $age_r(t)$  is the age of an individual root at time  $t$  ( $d$ ).

164 We assume that rhizodeposition stops when the root stops growing. The  
 165 rhizodeposits, which are already present in the soil, however, continue to diffuse  
 166 and decompose. Thus, after the root stopped growing, we need to solve:

$$\theta R \frac{\partial c}{\partial t} + \nabla \cdot (-D\theta \nabla c) = -\theta k c \quad \text{for } t > t_{stop}, \mathbf{x} \in \mathbb{R}^3, \quad (7)$$

$$c(\mathbf{x}, t_{stop}) = g(\mathbf{x}, t_{stop}), \quad (8)$$

167 where  $g(\mathbf{x}, t_{stop})$  is the solution concentration ( $\mu g cm^{-3}$ ) at time  $t_{stop}$  ( $d$ ). The  
 168 analytical solution of the problem with first-order reaction term given by equa-  
 169 tions (7) and (8) can be derived from the general solution of the homoge-  
 170 neous initial value problem (Evans, 1998) by making use of the transforma-  
 171 tion  $c' = c \times \exp(-k/R \times t)$  (Crank, 1979), where  $c'$  is the general solution of the  
 172 homogeneous problem (Evans, 1998):

$$c(\mathbf{x}, t) = \int_{\mathbb{R}^3} \frac{R^{3/2} g(\mathbf{y}, t_{stop})}{(4D\pi(t - t_{stop}))^{3/2}} \exp\left(-R \frac{(\mathbf{x} - \mathbf{y})^2}{4D(t - t_{stop})} - \frac{k(t - t_{stop})}{R}\right) d\mathbf{y} \quad (9)$$

The solution concentration around an entire root system was computed by adding up the concentrations around individual roots, making use of the superposition principle. Thus, the total solution concentration  $c_T$  around  $N$  roots is given by:

$$c_T(\mathbf{x}, t) = \sum_i^N c_i(\mathbf{x}, t) \quad (10)$$

### 173 3.1.3 Rhizodeposition model - application

174 The rhizodeposition model was implemented as an additional module in the  
175 root architecture model CPlantBox. The analytical solutions presented in equa-  
176 tions (5) and (6) were solved numerically using the Gauss-Legendre quadra-  
177 ture, which we derived from the open source library for C/C++ provided by  
178 Pavel Holoborodko (<http://www.holoborodko.com/pavel/>). This library was  
179 used within the C++ code of CPlantBox and introduced into its Python bind-  
180 ing so that we could compute the rhizodeposit distribution around a simulated  
181 root architecture. The analytical solution for the moving point source (equation  
182 (5)) was solved using the function 'gauss legendre', while the analytical solution  
183 for the moving line source (equation (6)) was solved using the function 'gauss  
184 legendre 2D cube' with 10 integration points per 1 *cm* root length. The vol-  
185 ume integral in equation (9) was solved by trapezoidal rule over a regular cubic  
186 grid of 1 *mm* edge length, and the integral was scaled in order to achieve mass  
187 balance for diffusion.

188 To reduce computational time, equations (5) and (6) were not evaluated for  
189 the entire soil domain, but only within a specified maximum influence radius  
190 around each root within which the rhizodeposit concentrations were significantly  
191 different from zero. This maximum influence radius was set to 0.6 *cm* for cit-  
192 rate and to 0.4 *cm* for mucilage, which was a rough estimation of the diffusion  
193 length. Since we used analytical solutions, the rhizodeposit concentrations had  
194 to be calculated individually around each root before they were added to get the  
195 concentration around the whole root system. To reduce computational time, we  
196 calculated the rhizodeposit concentrations around the individual roots of a root  
197 system in parallel using the multiprocessing package available in Python. In  
198 addition, it was necessary to run our model individually for each time step for  
199 which an output was needed. We ran all simulations on the Linux cluster of IBG-  
200 3 at the Research Center Juelich, which allowed us to run several model runs  
201 in parallel. The rhizodeposition model with the code used in this study is pub-  
202 licly available at [https://github.com/Plant-Root-Soil-Interactions-Modelling/  
203 CPlantBox/tree/pub\\_landl\\_2021](https://github.com/Plant-Root-Soil-Interactions-Modelling/CPlantBox/tree/pub_landl_2021).

### 204 3.2 Scenario setup and model parameterization

205 In a first scenario, we simulated rhizodeposition by a single growing root. This  
206 scenario was used to investigate the radial and axial distribution of rhizode-  
207 posits around the root. In this scenario, the root was assumed to grow straight  
208 downwards at a constant growth rate of 1 *cm d*<sup>-1</sup> until a root length of 10 *cm*  
209 was reached. The root then stopped growing. Rhizodeposition was computed  
210 for the two rhizodeposits citrate and mucilage, which have very distinct proper-  
211 ties. We used mucilage and citrate rhizodeposit release rates of *Vicia faba*. The  
212 rhizodeposit release rate is lower for citrate than for mucilage. The diffusion  
213 coefficient and the decomposition rate, in contrast, are higher for citrate than  
214 for mucilage. Furthermore, citrate is known to be sorbed to the soil particles  
215 (Oburger et al., 2011), while mucilage that is in contact with free water is not

216 (Sealey et al., 1995). While citrate is exuded from the root apex over a length of  
217 approximately 5 cm (Pineros et al., 2002), mucilage was shown to be deposited  
218 from an area of only a few  $mm^2$  right at the tip of the root (Iijima et al., 2003).  
219 All rhizodeposit properties were derived from literature and are presented in  
220 Table 1.

221 In a second scenario, we evaluated the impact of the two root architectural  
222 traits 'root growth rate' and 'branching density' on the rhizodeposition patterns  
223 around a growing single root respectively a simple herringbone root system. We  
224 thereby used four different constant root growth rates ( $0.1\text{ cm d}^{-1}$ ,  $0.5\text{ cm d}^{-1}$ ,  
225  $1\text{ cm d}^{-1}$ ,  $1.5\text{ cm d}^{-1}$ ) respectively two different branching densities ( $2\text{ cm}^{-1}$  and  
226  $1\text{ cm}^{-1}$ ). Citrate and mucilage rhizodeposit release rates were parameterized for  
227 *Vicia faba* using values from the literature (Table 1).

228 In a third scenario we simulated rhizodeposition by entire growing root sys-  
229 tems that were generated with CPlantBox to investigate the impact of different  
230 root architectures as well as the characteristics of different plants on the spatio-  
231 temporal distribution patterns of rhizodeposits. We chose the model plants  
232 *Vicia faba* and *Zea mays* with their contrasting tap and fibrous root systems.  
233 Root architecture parameters were obtained from  $\mu$ CT images of *Vicia faba* and  
234 *Zea mays* plants that were grown in a lab experiment (Gao et al., 2019). The  
235 root systems shown on the  $\mu$ CT images were thereby manually reconstructed in  
236 a three-dimensional virtual reality system (Stingaciu et al., 2013) and saved as  
237 RSML files (Lobet et al., 2015). These RSML files were then used to derive the  
238 required input parameters of CPlantBox with the help of a home-grown python  
239 code. All input parameters are presented in the Appendix. The rhizodeposit  
240 release rates of citrate and mucilage were adapted to *Vicia faba* and *Zea mays*  
241 using values from the literature and are presented in Table 1. The simulation  
242 time was set to 21 days, which is a typical time frame of the lab experiments  
243 that were used to image the plant root systems. Simulation outputs were gen-  
244 erated in daily time steps. The size of the soil domain was  $20 \times 20 \times 45\text{ cm}^3$  for  
245 *Vicia faba* and  $40 \times 40 \times 35\text{ cm}^3$  for *Zea mays*. In all simulation scenarios, the  
246 resolution of the soil domain was set to 1 mm and we used a constant soil water  
247 content of  $0.3\text{ cm}^3\text{ cm}^{-3}$ .

Table 1: Parameters used in the rhizodeposition model

| Parameter                                    | Symbol | Value    |         | Unit                                                            | Source                                                                         |
|----------------------------------------------|--------|----------|---------|-----------------------------------------------------------------|--------------------------------------------------------------------------------|
|                                              |        | Mucilage | Citrate |                                                                 |                                                                                |
| Diffusion coefficient in water               | $D_l$  | 3.46E-03 | 0.57    | $cm^2 d^{-1}$                                                   | Watt et al. (2006)                                                             |
| Diffusion impedance factor                   | $\tau$ | 0.3      | 0.3     | -                                                               | Olesen et al. (2001)                                                           |
| Retardation coefficient                      | $R$    | 1        | 16.7    | $(cm^3 cm^{-3})$                                                | Oburger et al. (2011), $R = \frac{b}{\theta}$ ,<br>$b$ is the buffer power (-) |
| Rhizodeposit release rate, <i>Vicia faba</i> | $Q$    | 33.38    | 18.4    | $\mu g d^{-1} root\ tip^{-1} /$<br>$\mu g d^{-1} cm\ root^{-1}$ | Zickenrott et al. (2016), Rangel et al. (2010)                                 |
| Rhizodeposit release rate, <i>Zea mays</i>   | $Q$    | 5.27     | 3.7     | $\mu g d^{-1} root\ tip^{-1} /$<br>$\mu g d^{-1} cm\ root^{-1}$ | Zickenrott et al. (2016), Pineros et al. (2002)                                |
| Decomposition rate                           | $k$    | 0.22     | 1.42    | $d^{-1}$                                                        | Nguyen et al. (2008), Kirk (1999)                                              |
| Deposition length behind the root tip        | $l$    | -        | 5       | cm                                                              | Iijima et al. (2003), Pineros et al. (2002)                                    |



### 248 3.2.1 Rhizodeposit hotspot analysis

249 Rhizodeposit hotspots are defined as the soil volumes around the root in which  
250 the concentration of rhizodeposits is above a critical threshold value and there-  
251 fore significantly influences specific rhizosphere processes. We defined these  
252 threshold values for citrate and mucilage using values from the literature. Gerke  
253 (2015) reported that a minimum total carboxylate concentration of  $5 \mu\text{mol g}^{-1}$   
254 soil leads to enhanced phosphorus mobilization. Assuming that citrate accounts  
255 for about 25 % of the total carboxylate concentration (Lyu et al., 2016) and using  
256 the soil buffer power as the ratio between the total rhizodeposit concentration  
257 and the soil solution rhizodeposit concentration (Nye, 1966), this corresponds  
258 to a threshold citrate concentration of  $58 \mu\text{g cm}^{-3}$  soil solution at an assumed  
259 bulk density of  $1.2 \text{ g cm}^{-3}$ . In a modelling study based on experimental measure-  
260 ments, Carminati et al. (2016a) investigated the effect of mucilage on rhizosphere  
261 hydraulic properties and transpiration as a function of mucilage concentration.  
262 For a sandy soil, they observed a measurable effect of mucilage on soil water  
263 retention at a minimum mucilage concentration of  $0.33 \text{ mg g}^{-1}$  dry soil, which  
264 corresponds to a threshold mucilage concentration of  $1300 \mu\text{g cm}^{-3}$  soil solution  
265 at an assumed bulk density of  $1.2 \text{ g cm}^{-3}$ . It was shown that not only fresh  
266 mucilage, but also mucilage derivatives that are produced during the process of  
267 decomposition can have an impact on soil hydraulic properties (Carminati and  
268 Vetterlein, 2013; Or et al., 2007). To date, however, it is not clear how mu-  
269 cilage derivatives affect soil water dynamics (Benard et al., 2019). In this study,  
270 degraded mucilage is neglected and only the concentration of fresh mucilage is  
271 taken into account.

272 To compare hotspot volumes of root systems that differ in architecture or  
273 age, we normalized them with the root length and with the minimum soil vol-  
274 ume that contains 99 % of the total rhizodeposit mass that is currently present  
275 in the soil domain. These relative hotspot volumes are further on called length-  
276 normalized and volume-normalized rhizodeposit hotspot volumes. While the  
277 length-normalized hotspot volume is a measure of the efficiency of the root ar-  
278 chitecture, the volume-normalized rhizodeposit hotspot volume can be regarded  
279 as a measure of the efficiency of rhizodeposition.

280 The duration of an individual rhizodeposit hotspot at a specific location  
281 in the soil domain is not constant, but varies depending on different dynamic  
282 processes such as the diffusion and decomposition rate, the sorption to soil par-  
283 ticles, the deposition length behind the root tip and the root architecture, which  
284 may cause rhizodeposit overlap. We therefore also investigated the lifetime of  
285 rhizodeposit hotspots within the soil domain.

286 To quantify the amount of soil volumes at various distances around hotspots  
287 and how these quantities evolve over time, we applied the 3D ImageJ Suite  
288 (Ollion et al., 2013) plugin of Fiji (Schindelin et al., 2012) to calculate the  
289 Euclidean 3D distance maps from the nearest hotspots at various days of root  
290 growth and provide the histograms of the distance maps.

## 291 4 Results

### 292 4.1 Scenario I: Rhizodeposition by a single growing root

293 Fig. 1 shows the concentration profiles of citrate and mucilage around a growing  
294 and exuding single root after a defined time period. After 10 days, the root  
295 reaches its maximum length of 10 *cm* and both root growth and rhizodeposition  
296 stop. Diffusion and decomposition of the rhizodeposits continue until the end  
297 of the simulation. For both citrate and mucilage, the concentrations are thus  
298 much higher after 10 days (Fig.1 (I)) than after 15 days (Fig.1 (II)) of simulation  
299 due to the ongoing decomposition of the rhizodeposits. The progressive diffusion  
300 furthermore leads to a larger extent of the radial profiles after 15 days compared  
301 to 10 days and also at position 2 (15 *cm* behind the root tip) compared to  
302 position 1 (1.5 *cm* behind the root tip). In general, concentrations of mucilage  
303 are higher than concentrations of citrate due to the differences in rhizodeposit  
304 properties. The peak concentration of mucilage is located at a distance of 1 *cm*  
305 behind the root tip, while citrate concentrations are highest 5 *cm* behind the  
306 root tip. This difference is caused by the differences in the deposition lengths  
307 (Table 1, Fig.1 (a)). The radial extension of the concentration from the root  
308 axis is larger for citrate than for mucilage due to the larger ratio of the effective  
309 diffusion coefficient and the retardation factor (Fig.1 (b,c)). The rhizodeposit  
310 hotspot concentrations extend over a length of 5.3 *cm* and 2.2 *cm* along the root  
311 axis for citrate and mucilage, respectively, while the root is still growing (Fig.1  
312 Ia). The maximum radial extent of the rhizodeposit hotspot concentration is  
313 1 *mm* and 0.5 *mm* for citrate and mucilage, respectively, while the root is still  
314 growing (Fig.1 Ib, c).

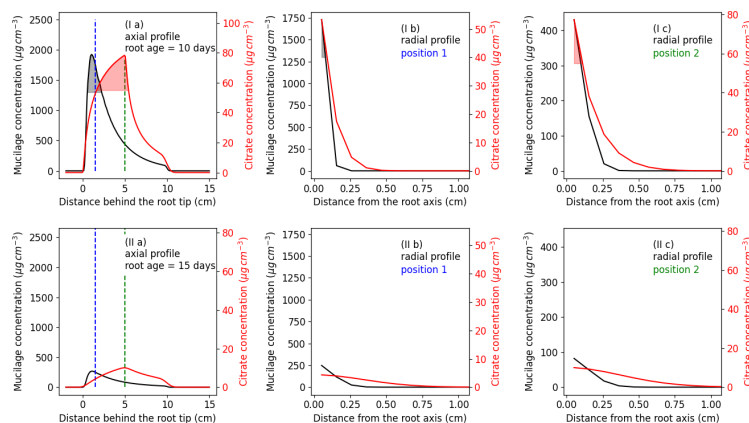

Figure 1: Concentration profiles of mucilage and citrate after (I) 10 and (II) 15 days: along the root axis (a) and radially from the root axis at a distance of 1.5 cm (position 1) (b) and 15 cm (position 2) (c) from the root tip; the shaded areas denote the part of the profiles where the concentrations are above the threshold values

## 315 4.2 Scenario II: Impact of root architectural traits on the 316 rhizodeposition patterns around a single growing root

### 317 4.2.1 Impact of root growth rate

318 Considering that rhizodeposits are released from the growing tip in the case of  
319 mucilage respectively from a small zone behind the growing tip in the case of  
320 citrate, changes in root elongation rate have a strong impact on the distribution  
321 of rhizodeposits in the soil. In figures 2 and 3 the concentrations of mucilage  
322 and citrate around a single straight root that elongates for 10 days at different  
323 constant growth rates are shown. A larger growth rate obviously leads to a  
324 larger soil volume containing rhizodeposits at a lower concentration. In black,  
325 we depicted the volume of rhizodeposit hotspots for both citrate and mucilage.  
326 Interestingly, the largest rhizodeposit hotspot volume was found for the second  
327 lowest root growth rate of  $0.5 \text{ cm d}^{-1}$  for citrate and for the second highest root  
328 growth rate of  $1 \text{ cm d}^{-1}$  for mucilage. This can be explained by the opposite  
329 effect of the growth rate on the concentration where exudation takes place,  
330 which increases with decreasing growth rate, and of the soil volume containing  
331 rhizodeposits, which increases with increasing growth rate.

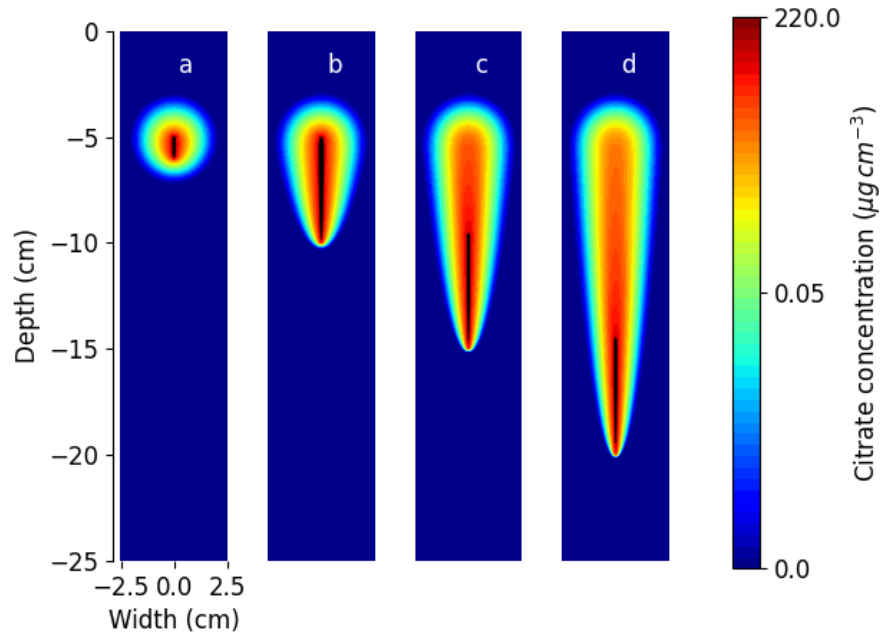

Figure 2: Concentration of citrate deposits around a single root after 10 days of growth at a constant growth rate of (a)  $0.1 \text{ cm d}^{-1}$ , (b)  $0.5 \text{ cm d}^{-1}$ , (c)  $1 \text{ cm d}^{-1}$ , (d)  $1.5 \text{ cm d}^{-1}$ ; the black patches denote the hotspot volume; note that the colors are in logarithmic scale

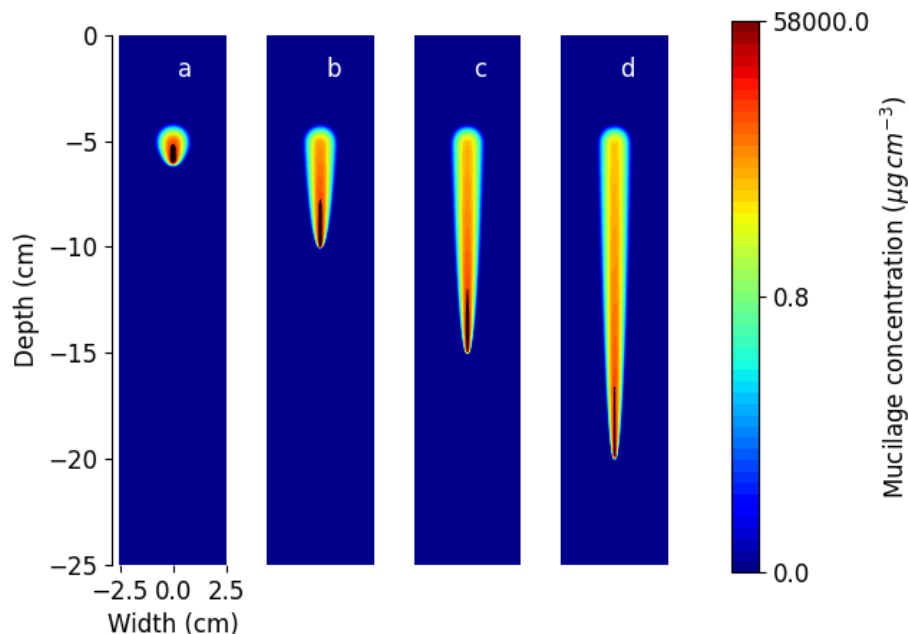

Figure 3: Concentration of mucilage deposits around a single root after 10 days of growth at a constant growth rate of (a)  $0.1 \text{ cm d}^{-1}$ , (b)  $0.5 \text{ cm d}^{-1}$ , (c)  $1 \text{ cm d}^{-1}$ , (d)  $1.5 \text{ cm d}^{-1}$ ; the black patches denote the hotspot volume; note that the colors are in logarithmic scale

#### 332 4.2.2 Impact of root branching patterns

333 After the rhizodeposits are released at the root tip or in a small zone behind the  
334 root tip, they gradually diffuse and are decomposed by microorganisms. The  
335 number of root tips, which is related to the branching density of a root system,  
336 therefore has a significant impact on the total mass of released rhizodeposits,  
337 but also on the soil volume with rhizodeposit concentrations above the threshold  
338 value. Fig. 4 shows the rhizodeposition patterns around two simple herringbone  
339 root systems with different branching densities for both citrate and mucilage.  
340 An increase in branching density by a factor of two (from 9 to 16 root tips)  
341 increased the total mass of rhizodeposits present in the soil domain by 48%  
342 for citrate and by 79% for mucilage after 10 days of growth. This difference is  
343 caused by the differences in rhizodeposit release, diffusion, decomposition and  
344 sorption rate between citrate and mucilage. It can be seen that there are no  
345 rhizodeposit hotspot volumes (depicted in pink) around the upper laterals. This  
346 is because root growth and therefore also rhizodeposit release of lateral roots has  
347 already stopped and the ongoing decomposition and diffusion processes have led

348 to rhizodeposit concentrations below the threshold value. It can also be seen  
349 that the citrate rhizodeposit hotspot volumes are located further behind the  
350 root apex than the mucilage rhizodeposit hotspot volumes. This difference is  
351 caused by the differences in the deposition lengths (Table 1 and cf. Fig.1  
352 (a)). An increase in branching density by a factor of two increased the total  
353 rhizodeposit hotspot volume by 80 % and 73 %, the length-normalized hotspot  
354 volume by 13 % and 9 % and the volume-normalized hotspot volume by 51 %  
355 and 29 % for citrate and mucilage, respectively, after 10 days of growth. For  
356 our parameterization, root branching thus had a greater impact on the total  
357 rhizodeposit hotspot volume and also on the rhizodeposition efficiency of citrate  
358 than of mucilage. If lateral branches were shorter, the opposite would have been  
359 the case due to the difference in deposition length between citrate and mucilage.

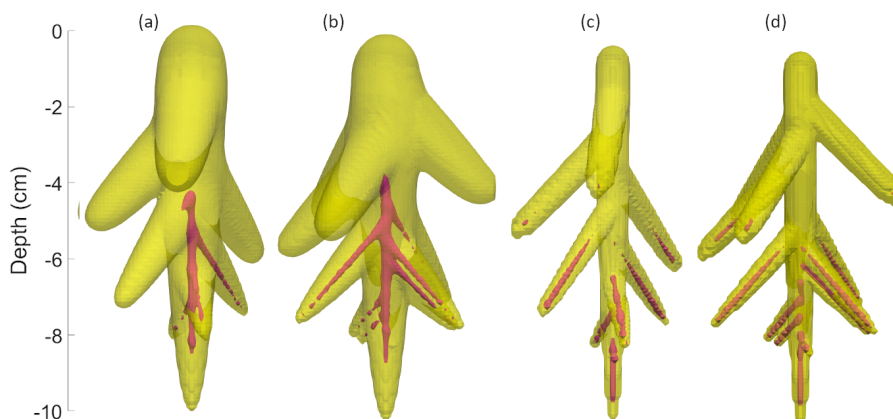

Figure 4: Deposition patterns of rhizodeposit hotspot concentrations (pink) and concentrations above the arbitrary threshold of  $0.1 \mu\text{g cm}^{-3}$  (yellow) for citrate (a,b) and mucilage (c,d) around a simple herringbone root system with different branching densities ( $1 \text{ cm}^{-1}$  (a,c) and  $2 \text{ cm}^{-1}$  (b,d)) after 10 days of growth at a constant growth rate of  $1 \text{ cm d}^{-1}$

### 360 4.3 Scenario III: Rhizodeposit concentration patterns around 361 the root systems of *Vicia faba* and *Zea mays*

362 Fig. 5 shows the rhizodeposit concentration patterns of citrate and mucilage  
363 around the 21 day old root systems of *Vicia faba* and *Zea mays*. The maximum  
364 extent of the rhizosphere was defined using an arbitrary threshold of  
365  $0.1 \mu\text{g cm}^{-3}$ . Due to the higher deposition rates (Table 1), the maximum mucilage  
366 concentrations are larger than the maximum citrate concentrations for  
367 both *Vicia faba* and *Zea mays* and the concentrations of one specific rhizodeposit  
368 (citrate respectively mucilage) are larger for *Vicia faba* than for *Zea mays*.  
369 Furthermore, it can be seen that the extent of the citrate rhizosphere (Fig. 5

370 (a,c) is larger than the extent of the mucilage rhizosphere (Fig. 5 (b,d)). This  
371 is caused by the different properties of citrate and mucilage (Table 1).

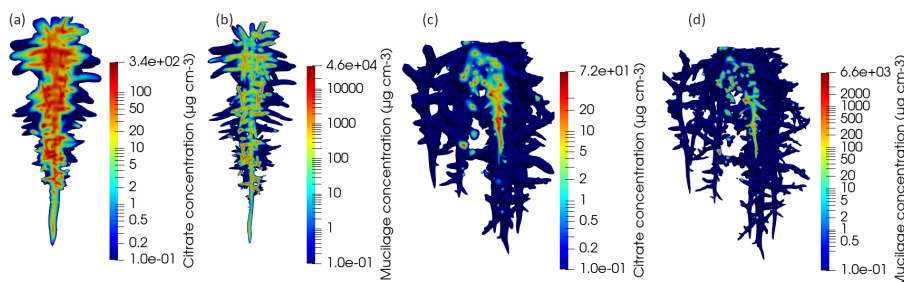

Figure 5: Vertical cut through the distribution of the rhizodeposit concentrations around 21 day old root systems (citrate around *Vicia faba* (a), mucilage around *Vicia faba* (b), citrate around *Zea mays* (c), mucilage around *Zea mays* (d)); note that the colors are in logarithmic scale and that the color scales differ for the different figures

#### 372 4.3.1 Differences in the rhizodeposition patterns around the tap and 373 fibrous root systems of *Vicia faba* and *Zea mays*

374 Fig. 6 shows the amount of released citrate and mucilage rhizodeposits from  
375 the root systems of *Vicia faba* and *Zea mays* with time. The total mass of rhi-  
376 zodeposits present in the soil domain gradually increases while the root system  
377 is growing. It is larger for mucilage than for citrate and mostly also larger for  
378 *Vicia faba* than for *Zea mays*. Only between simulation day 5 and simulation  
379 day 8, the emergence time of lateral roots of *Vicia faba*, the total rhizodeposit  
380 mass is larger for *Zea mays* than for *Vicia faba* (Fig. 6 (a)). The total mass  
381 of rhizodeposits normalized with the total root length shows very distinct pat-  
382 terns for *Vicia faba* and *Zea mays* (Fig. 6 (b)). For *Vicia faba*, the curve clearly  
383 reflects the development of the root architecture: At simulation day 6, the first  
384 lateral roots emerge, which is reflected by a sharp increase in the root length-  
385 normalized mucilage mass. For citrate, which is released over a length of 5 cm  
386 behind the root apex, this increase can be seen to a lesser extent and with a  
387 certain delay. For *Zea mays*, the length-normalized citrate and mucilage masses  
388 remain relatively constant over the entire simulation period, which is caused by  
389 the large number of basal roots and the early emergence of first order laterals  
390 at simulation day 3, which level out any visible impact of root architecture.  
391 Similar patterns arise for the total mass of rhizodeposits normalized with the  
392 number of root tips (Fig. 6 (c)). For *Vicia faba*, the emergence of first and  
393 second order lateral roots (simulation day 6 and 7, respectively), is reflected in  
394 the curves of both citrate and mucilage. For *Zea mays*, the curves are relatively  
395 stable over the entire simulation period. Fig. 6 (d) shows the total mass of

396 rhizodeposits normalized with the volume of the convex hull of the root system.  
 397 At the beginning of the simulation period, the values are extremely large due  
 398 to the small volume of the convex hull, but they level out at approximately  
 399 simulation day 7. It can be seen that for both citrate and mucilage, the convex  
 400 hull normalized rhizodeposit mass and thus the rhizodeposit concentrations are  
 401 larger for *Vicia faba* than for *Zea mays*.

402 On simulation day 21, the root system of *Zea mays* was 2 times longer, had  
 403 3.5 times more root tips, and had a convex hull volume 3.7 times larger than the  
 404 root system of *Vicia faba* (Fig. 6 (b,c,d), red curves). However, the total mass  
 405 of released citrate and mucilage was only 11 % and 14 % of that of *Vicia faba*,  
 406 respectively (Fig. 6 (a)). According to our simulations, the larger root system of  
 407 *Zea mays* could therefore not make up for the lower rhizodeposit release rate as  
 408 compared to *Vicia faba* to reach similar amounts of rhizodeposit mass released  
 409 into the soil.

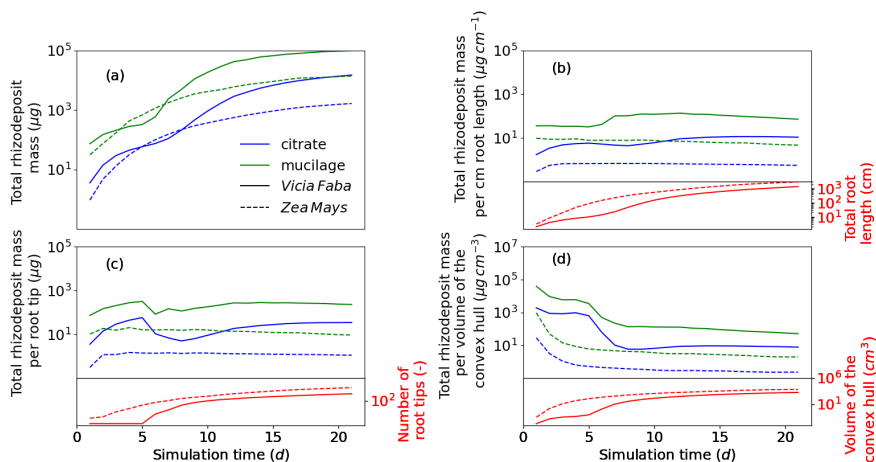

Figure 6: Total amount of released rhizodeposit mass over time (a), normalized with the total root length (b), normalized with the number of root tips (c) and normalized with the volume of the convex hull (d) for citrate and mucilage and the root systems *Vicia faba* and *Zea mays*; note that all axes are in logarithmic scale

#### 410 4.3.2 Rhizodeposit hotspot analysis

411 Due to the steep gradients in the radial rhizodeposit concentration profiles (Fig.  
 412 1 (I b,c) and (II b,c)), only the rhizodeposit concentrations in the immediate  
 413 vicinity of the root surface as well as close to growing root tips are higher than  
 414 the threshold values. Due to the decomposition and diffusion processes, only  
 415 the rhizodeposit concentrations around younger roots that are still growing or  
 416 where rhizodeposit overlap has occurred are higher than the threshold values.



417 Unfortunately, the volume of rhizodeposit hotspot concentrations around the  
418 root system of *Zea mays* was so small that we could not capture it with our  
419 soil domain resolution of 1 mm. The hotspot analysis was therefore only per-  
420 formed for the root system of *Vicia faba*. An illustration of the distribution of  
421 rhizodeposit hotspots of citrate and mucilage around the root system of *Vicia*  
422 *faba* after 21 days of simulation is presented in Fig. 7.

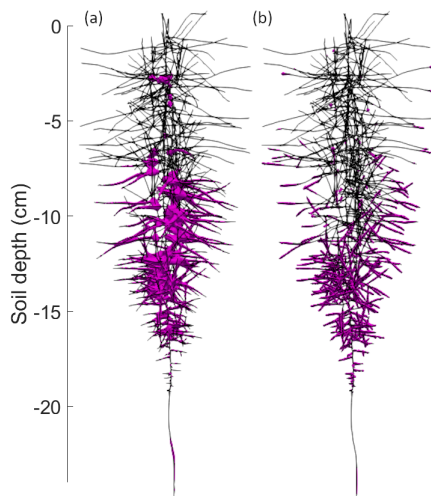

Figure 7: Distribution of rhizodeposit hotspots (pink patches) of citrate (a) and mucilage (b) around a 21 day old root system of *Vicia faba*

#### 423 4.3.2.1 Development of the rhizodeposit hotspot volume and its de- 424 pendence on root branching

425 Fig. 8 shows the development of the rhizodeposit hotspot volume and its de-  
426 pendence on root branching. Due to the increasing root system length and  
427 the increasing number of root tips, the rhizodeposit hotspot volume increased  
428 with increasing simulation time for both citrate and mucilage and was generally  
429 larger for citrate than for mucilage (Fig. 8 (a)). A different picture emerged,  
430 however, when the rhizodeposit hotspot volume was normalized with the root  
431 length (Fig. 8 (b)). Until simulation day 5, the root system of *Vicia faba* con-  
432 sisted only of a taproot without any laterals. For mucilage, which is deposited  
433 at the root tip, the root length-normalized hotspot volume therefore decreased  
434 until the emergence of lateral roots. For citrate, which is exuded over a length  
435 of 5 cm behind the root apex, the root length-normalized hotspot volume in-  
436 creased until the deposition length was reached, and thereafter decreased until  
437 the first lateral roots emerged. At the emergence time of lateral roots, the root  
438 length-normalized hotspot volume of citrate and mucilage increased until ap-  
439 proximately simulation day 12 and 15, respectively, and thereafter decreased.  
440 This decrease in root length normalized hotspot volume is caused on the one

441 hand by roots that are still growing but whose hotspot volume remains con-  
442 stant with growth and on the other hand by roots that have stopped growing  
443 and therefore no longer release rhizodeposits. Due to the difference in deposi-  
444 tion length, the decrease in the root length-normalized hotspot volume occurs  
445 later for citrate than for mucilage. Fig. 8 (c) shows the development of the  
446 volume-normalized hotspot volume. Again, due to the lack of lateral roots, the  
447 volume-normalized hotspot volume decreased for both mucilage and citrate un-  
448 til simulation day 5. For both citrate and mucilage, it subsequently increased  
449 up to a peak value at approximately simulation day 10 and 13, respectively, and  
450 thereafter decreased again. Thus, the maximum rhizodeposition efficiency for  
451 citrate was reached on simulation day 10 and for mucilage on simulation day  
452 13. Interestingly, until about simulation day 15, the rhizodeposition efficiency  
453 was greater for mucilage than for citrate, but about the same at the end of the  
454 simulation. This is due to the differences in rhizodeposition, diffusion, sorption  
455 and decomposition rates between citrate and mucilage.

456 Fig. 8 also shows the enormous effect of root branching on the development  
457 of rhizodeposit hotspots. The larger the root system became, the more im-  
458 portant the lateral roots were for the development of the rhizodeposit hotspot  
459 volumes. At the last day of the simulation, 1<sup>st</sup> order lateral roots accounted for  
460 39% and 47% of the total rhizodeposit hotspot volume for citrate and mucilage,  
461 respectively. 2<sup>nd</sup> order lateral roots accounted for 61% and 53% of the total  
462 rhizodeposit hotspot volume for citrate and mucilage and were therefore even  
463 more important than 1<sup>st</sup> order lateral roots and more important for citrate than  
464 for mucilage hotspots (Fig. 8 (a)). For both citrate and mucilage, the length-  
465 normalized hotspot volume was relatively similar for lateral roots of 1<sup>st</sup> and 2<sup>nd</sup>  
466 order and significantly smaller for the taproot (Fig. 8 (b)). This is partly due  
467 to the shorter lateral roots compared to the taproot and partly because most of  
468 the rhizodeposits around the taproot are already decomposed at the end of the  
469 simulation. In terms of volume-normalized rhizodeposit hotspot volume, and  
470 thus rhizodeposition efficiency, the influence of 1<sup>st</sup> and 2<sup>nd</sup> order lateral roots  
471 was again quite similar and much smaller for the taproot. This was true for  
472 both citrate and mucilage.

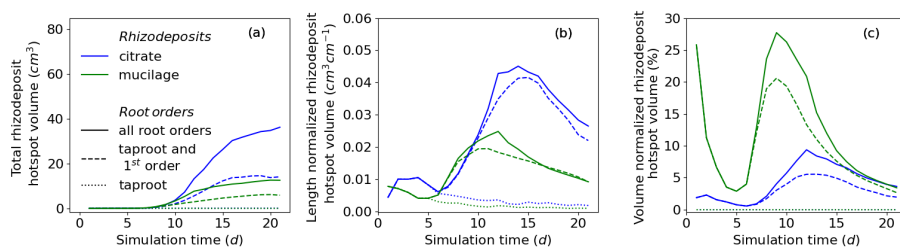

Figure 8: Impact of different root orders on the total rhizodeposit hotspot volume (a) on the total rhizodeposit hotspot volume per cm root length (b) and on the total rhizodeposit hotspot volume relative to the minimum rhizodeposit concentration volume of 99 % of the total rhizodeposit mass that is currently present in the soil domain (c)

#### 473 4.3.2.2 Impact of rhizodeposit overlap on the rhizodeposit hotspot 474 volume

475 Fig. 9 (a) shows the impact of overlapping rhizodeposition zones on the rhi-  
476 zodeposit hotspot volume of citrate and mucilage around the root system of  
477 *Vicia faba*. Interestingly, the impact of overlapping rhizodeposition zones on  
478 the total rhizodeposit hotspot volume is much more important for citrate than  
479 for mucilage. This is caused by the different rhizodeposition behaviour of cit-  
480 rate and mucilage: While mucilage rhizodeposition takes place exclusively at  
481 the root tip, citrate is exuded over a length of approximately 5 cm behind the  
482 root apex (Table 1). Therefore, at root branching zones, where rhizodeposi-  
483 tion zones overlap, citrate concentrations around the individual roots are high  
484 enough to jointly produce rhizodeposit hotspots, whereas this is not the case for  
485 mucilage. Furthermore, rhizodeposit concentration volumes around the root are  
486 larger for citrate than for mucilage. The possibility of overlapping rhizodeposi-  
487 tion zones is then also larger for citrate than for mucilage. Due to the increasing  
488 number of laterals, the relative share of total hotspot volume caused by rhizode-  
489 posit overlap increases with increasing simulation time. At simulation day 21,  
490 overlapping rhizodeposition zones accounted for 64% of the total citrate rhizode-  
491 posit hotspot volume and for 10% of the total mucilage rhizodeposit hotspot  
492 volume around the root system of *Vicia faba*. Interestingly, the total rhizode-  
493 posit hotspot volume without overlap is only slightly higher for citrate than for  
494 mucilage. In the case of high branching densities, it can be assumed that indi-  
495 vidual hotspot volumes around roots will overlap, thereby leading to a decrease  
496 in the total rhizodeposit hotspot volume. For our parameterization, however,  
497 the hotspot volumes that were created by rhizodeposition overlap were more  
498 important than the hotspot volumes that were lost by rhizodeposition overlap.  
499 Fig. 9 (b,c) shows the location of overlapping rhizodeposition zones around the  
500 root system of *Vicia faba* on the last day of simulation. It can be seen that most  
501 of the overlap happens close to the root axis where the branching takes place.

502 Rhizodeposit overlap due to individual roots that cross each other freely in the  
503 soil domain is less significant.

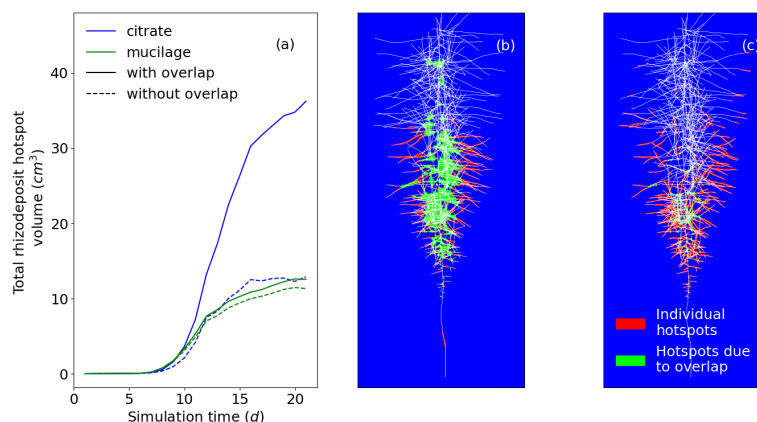

Figure 9: Impact of overlapping rhizodeposition zones on the total rhizodeposit hotspot volume (a), maximal projection along the y-axis of the location of rhizodeposit hotspots caused by overlapping rhizodeposition zones and caused by rhizodeposition from individual roots for citrate (b) and mucilage (c) on simulation day 21

#### 504 4.3.2.3 Analysis of the duration of rhizodeposit hotspots

505 The maximum number of days on which hotspot concentrations were reached  
506 at a specific location in the soil domain was 16 days for citrate and 9 days for  
507 mucilage (Fig. 10 (a)). In general, the longer the duration of the hotspots,  
508 the lower was the volume of rhizodeposit hotspots and thus the frequency of  
509 rhizodeposit hotspot duration. Interestingly, the most common duration of the  
510 rhizodeposit hotspot for mucilage was 3 days. This is the average time between  
511 the release of the mucilage at the root tip and its degradation to a concentration  
512 below the threshold value. Fig. 10 (b, c) shows the local distribution of the  
513 durations of the rhizodeposit hotspots. It can be seen that for both citrate and  
514 mucilage, the longest duration of rhizodeposit hotspots occurs near the tap-  
515 root, where root branching takes place and therefore overlapping rhizodeposit  
516 zones occur more frequently. Furthermore, long-lasting rhizodeposit hotspots  
517 occur more frequently around older parts of the root system. Lateral roots of  
518 higher order at a greater distance from the taproot do not show long durations  
519 of rhizodeposit hotspots. This effect is more pronounced for citrate than for  
520 mucilage.

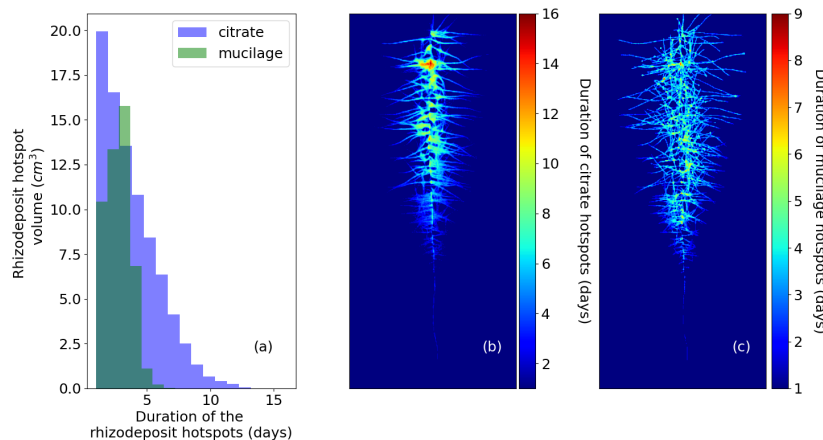

Figure 10: Duration and volume of rhizodeposit hotspots for citrate and mucilage (a); maximal projection along the y-axis of the duration of rhizodeposit hotspots at the different locations in the soil domain for citrate (b) and mucilage (c)

#### 521 4.3.2.4 Analysis of distance maps from rhizodeposit hotspots

522 Histograms of distance maps (Fig. 11) of *Vicia faba* show that the volume of  
 523 soil that is close to a hotspot increases more and more over the simulated 20  
 524 day period. At day 5, the small root system and its hotspots are in the top  
 525 center of the pot and the equidistant surfaces with distances of less than 10 cm  
 526 from the hotspots are approximately semi-spheres around the root system: the  
 527 parabolic increase of the histogram for less than 10 cm distances corresponds  
 528 to the increase in area of a semi-sphere of radius  $r$  which is  $0.5 \cdot (4\pi r^2)$ . At  
 529 a distance of around 10 - 15 cm, which corresponds to the phase where the  
 530 equidistant surface reaches the side boundaries of the pot, the histogram line  
 531 decreases. From 15 - 35 cm it remains rather constant and then drops rapidly  
 532 at a distance of 35 cm, which corresponds to the phase where the equidistant  
 533 surface reaches the lower boundary of the pot. At day 10, more and deeper  
 534 hotspots have emerged and as a consequence the peak in the histogram at  
 535 around 10 cm becomes smoother and the drop of the curve occurs now already  
 536 at 25 cm. At day 15, the heterogeneous distribution of several hotspots within  
 537 the domain results in a rough histogram line for distances of less than 10 cm  
 538 and hotspots in deeper regions cause a drop at already 15 - 20 cm distance where  
 539 the equidistant surface reaches the lower boundary of the pot. Till day 15, the  
 540 curves for citrate and mucilage are very similar. At day 20, for citrate, there  
 541 is a peak of the soil volume at a distance of 5 cm from the hotspots and for  
 542 mucilage at a distance of 3 cm. At day 20, mucilage shows a larger soil volume

543 in the first five centimeters compared to citrate, which is caused by the wider  
544 respectively less clumped distribution of the mucilage hotspots (cf. Fig. 7).

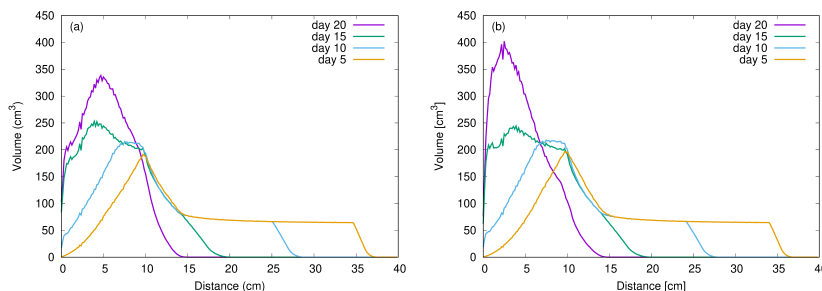

Figure 11: Histograms of distance maps of the Euclidean 3D distance from nearest citrate (a) and mucilage (b) hotspots for *Vicia faba* at day 5, day 10, day 15 and day 20; note that the scales differ in the sub-figures (a) and (b)

## 545 5 Discussion

### 546 5.1 The rhizodeposition model

547 In our rhizodeposition model, the roots are considered as line sources. The  
548 potential impact of the root diameter on the concentration of rhizodeposits is  
549 therefore neglected. To fulfill this assumption, the used grid resolution must be  
550 larger than the root diameter. On the other hand, a fine enough grid resolution  
551 must be chosen to capture small-scale variations in the spatial distribution of  
552 rhizodeposits caused by the steep gradients. Considering that primary roots of  
553 *Vicia faba* and *Zea mays* have mean root diameters of approximately 0.95 mm  
554 and 0.85 mm (Materchera et al., 1991), we assumed that a grid resolution of  
555 1 mm is suitable to simulate the spatio-temporal distribution of rhizodeposits  
556 around the growing root systems of *Vicia faba* and *Zea mays*.

557 For a soil domain with dimensions of  $40 \times 40 \times 35$  cm, this resolution resulted  
558 in a total number of  $5.6 \times 10^7$  grid points. For each of these grid points, the rhi-  
559 zodeposit concentration had to be calculated analytically. To keep computation  
560 times within acceptable limits, we computed the rhizodeposit concentrations  
561 only within a specified radius around each root and parallelized the computa-  
562 tion of rhizodeposit concentrations around individual roots.

563 To overcome the problem of the line source assumption as well as the high  
564 computational cost, the analytical solution could be transformed into a numeri-  
565 cal approach. Such a numerical approach could also be integrated into a 3D  
566 multi-component model of solute transport in soil and roots like the one pro-  
567 posed by Mai et al. (2019). This model could then be used to study nutrient  
568 acquisition by the root system under the influence of dynamic rhizodeposition  
569 patterns and furthermore to evaluate the impact of root hairs respectively dif-  
570 ferences in root diameter on rhizodeposition patterns.

571 In all simulations, we assumed a constant water content of  $0.3 \text{ cm}^3 \text{ cm}^{-3}$  in  
572 the rhizosphere over the entire simulation period. This assumption is supported  
573 by the experimental work of Holz et al. (2018b) and Moradi et al. (2011), who  
574 found that the water content in the rhizosphere remained constant regardless  
575 of drought stress, which they explained with the high water holding capacity of  
576 the mucilage present in the rhizosphere.

577 In our rhizodeposition model, we did not consider the effect of root hairs.  
578 Holz et al. (2018b) showed that plants with root hairs released significantly  
579 more carbon into the soil than plants without root hairs. Carminati et al.  
580 (2016b) suggested that the interaction between root hairs and mucilage may  
581 have an important influence on root water uptake. While the role of root hairs  
582 is to extend the functional root radius (Segal et al., 2008), mucilage may keep  
583 the rhizosphere and the space between root hairs moist, thereby facilitating  
584 water flow into root hairs under negative soil water potentials. As a further  
585 development, it would thus be interesting to extend our rhizodeposition model  
586 by the function of root hairs.

587 To date, it is not clear how the release of rhizodeposits from an individual  
588 root develops with root aging. In our model, we assumed a constant rhizodepo-  
589 sition release rate while the root is growing. As soon as the root stops growing,  
590 also rhizodeposition is assumed to stop. Several experimental studies have re-  
591 ported that the total mass of rhizodeposits around a root root system is low  
592 at the seedling stage of a plant, increases until flowering, and then decreases  
593 at maturity (Aulakh et al., 2001; Gransee and Wittenmayer, 2000; Krasil'nikov  
594 et al., 1958; Nguyen, 2009). Our model assumptions allow us to simulate such  
595 rhizodeposition behaviour and we therefore consider them as justified.

596 Fresh mucilage, which is in contact with water, is known to diffuse freely  
597 into the soil (Sealey et al., 1995). When the soil dries, however, mucilage forms  
598 strong bonds between soil particles and can no longer move by diffusive trans-  
599 port (Ahmed et al., 2014; Albalasmeh and Ghezzehei, 2014; Sealey et al., 1995).  
600 In our simulations, we assumed a constant soil water content and did not take  
601 into account soil drying. Mucilage was therefore also assumed to diffuse freely  
602 into the soil. In simulations where soil drying is considered, however, the im-  
603 mobilization of mucilage must be taken into account.

604 When microbes decompose mucilage, they are known to simultaneously re-  
605 lease gel-like substances called bacterial exopolysaccharides (EPS) (Carminati  
606 and Vetterlein, 2013). It has been shown that these substances have similar  
607 physical properties to mucilage and are therefore likely to have an effect on the  
608 hydraulic properties of the soil (Or et al., 2007). In our study, simulated concen-  
609 trations of mucilage only refer to fresh mucilage, but not to mucilage derivatives.  
610 Similarly, we only considered concentrations of fresh mucilage above the spec-  
611 ified threshold value as mucilage hotspots. However, for simulations in which  
612 both mucilage deposition and soil water transport are taken into account, the  
613 impact of mucilage derivatives on soil hydraulic properties must be considered.

## 614 5.2 Rhizodeposition by a single growing root

615 The simulated radial extent of citrate and mucilage rhizodeposit hotspot rhi-  
616 zospheres was 1 mm and 0.5 mm, respectively. The simulated radial extent of  
617 citrate and mucilage rhizospheres in which the rhizodeposit concentration was  
618 below the threshold value, but still detectable, was 4 – 9 mm and 2 – 5 mm,  
619 respectively. For mucilage, these values are in the same range as the experi-  
620 mental findings by Holz et al. (2018a) and the calculated values by Zickenrott  
621 et al. (2016), who reported rhizosphere extents between 0.6 mm and 2 mm. For  
622 citrate, the radial rhizosphere extents are in the same order of magnitude as  
623 the results for rhizodeposited  $^{14}\text{C}$  by Kuzyakov et al. (2003), who measured a  
624 zone of maximum carbon exudate concentration within a distance of 1 – 2 mm  
625 from the root surface and a zone of less significant amounts of carbon exudate  
626 concentration within a distance of 3 – 10 mm from the root surface. It must be  
627 noted that the experimental conditions and model assumptions in the studies  
628 by Holz et al. (2018a), Zickenrott et al. (2016) and Kuzyakov et al. (2003) were  
629 not the same as in our modelling setup. They differed with regard to plant  
630 species, plant age, water content and pot geometry and may therefore only be  
631 regarded as an indicative of the order of magnitude.

## 632 5.3 Impact of root architectural traits on rhizodeposition 633 patterns

634 It is well known that root architectural traits have a significant effect on the  
635 distribution of rhizodeposits around the root system and thus on rhizosphere  
636 processes (Holz et al., 2018b; Lynch, 1995; Nielsen et al., 1994). A detailed  
637 analysis about the impact of individual root architectural traits such as root  
638 growth rate and branching density on rhizodeposit hotspot volumes and on the  
639 rhizodeposition efficiency, however, is still lacking.

640 Holz et al. (2018b) suggested that reduced root elongation leads to a higher  
641 rhizodeposit concentration per rhizosphere soil volume and thus - in the case of  
642 mucilage - to an increase in the local water content. In the present study, we  
643 made a more detailed analysis of the impact of different root growth rates on  
644 the rhizodeposit concentration per rhizosphere soil volume. Considering that  
645 a minimum rhizodeposit concentration is required to trigger certain processes,  
646 such as an increase in soil water content in the case of mucilage or increased  
647 phosphorus mobilization in the case of citrate, an intermediate root growth rate  
648 has the greatest effect on rhizosphere processes. If root growth is too fast,  
649 the soil volume containing rhizodeposits is large, but the rhizodeposit concen-  
650 tration is below the threshold that triggers a specific rhizosphere process. If  
651 root growth is too low, the rhizodeposit concentration is very high, but the soil  
652 volume containing such high rhizodeposit concentrations is very low. For our  
653 parameterization, the optimal growth rate has been shown to be greater for  
654 mucilage than for citrate. It can be speculated that roots take advantage of this  
655 effect: When root elongation decreases due to environmental factors, such as  
656 soil mechanical impedance, a larger rhizodeposit hotspot volume may result in



657 increased rhizosphere water content in the case of mucilage or increased phos-  
658 phosphate availability in the case of citrate, thus compensating for the disadvantages  
659 of a smaller root system.

660 Nielsen et al. (1994) and Lynch (1995) reported that highly branched root  
661 systems with a large number of root tips have a higher nutrient uptake efficiency  
662 and thus a greater influence on rhizosphere processes. Similarly, (Fletcher et al.,  
663 2020) found that the number of root tips of a root system correlated well with  
664 an increase in citrate-enhanced phosphate uptake. This is consistent with the  
665 results of our simulations, which also showed larger soil volumes of rhizodeposit  
666 hotspots when the number of root tips was increased.

#### 667 **5.4 Rhizodeposition patterns around growing root sys-** 668 **tems**

669 Zickenrott et al. (2016) estimated that mucilage concentrations of up to  $4 \times$   
670  $10^4 \mu\text{g cm}^{-3}$  soil can potentially occur in the rhizosphere. In our simulations, the  
671 maximum observed mucilage concentrations ranged between  $6.6 \times 10^3 \mu\text{g cm}^{-3}$   
672 soil for *Zea mays* and  $2.7 \times 10^5 \mu\text{g cm}^{-3}$  soil for *Vicia faba* and are therefore in  
673 good agreement with this estimated maximum value. Gerke (2015) and Jones  
674 (1998) found maximum citrate concentrations in the rhizosphere between  $1 \times 10^3$   
675 and  $4 \times 10^3 \mu\text{g cm}^{-3}$  soil. These ranges are a bit higher than our maximum sim-  
676 ulated citrate concentrations of  $72 \mu\text{g cm}^{-3}$  soil for *Zea mays* and  $938 \mu\text{g cm}^{-3}$   
677 soil for *Vicia faba*. This can be explained by the fact that other plants such as  
678 *Lupinus albus* and *Cicer arietinum* have been shown to release much greater  
679 amounts of citrate into the soil than *Vicia faba* and, even more significantly,  
680 than *Zea mays* (Lyu et al., 2016).

681 It is well known that fibrous root systems such as *Zea mays* show lower  
682 rhizodeposit release rates than tap root systems such as *Vicia faba* (Lyu et al.,  
683 2016; Zickenrott et al., 2016). On the other hand, fibrous root systems generally  
684 have a much larger number of root tips, from which rhizodeposits are released.  
685 Our hypothesis was that the greater number of root tips of *Zea mays* may  
686 compensate for the lower rhizodeposit release rates, producing similar amounts  
687 of mucilage and citrate release into the soil as the tap root system *Vicia faba*.  
688 This hypothesis, however, could not be confirmed. Even though the simulated  
689 root system of *Zea mays* was 2 times longer and had 3.5 times more root tips  
690 than the simulated root system of *Vicia faba* on the last day of simulation, the  
691 total simulated mass of released rhizodeposits around the root system of *Zea*  
692 *mays* relative to *Vicia faba* was only 21% for mucilage and 11% for citrate.  
693 These results indicate that *Zea mays* and *Vicia faba* employ different strategies  
694 in the interplay between root morphological and root physiological traits to  
695 optimize root water and nutrient acquisition.

696 The rhizodeposit hotspot analysis showed the importance of root branching  
697 and the role of overlapping rhizodeposition zones for the development of rhi-  
698 zodeposit hotspots. 1<sup>st</sup> and 2<sup>nd</sup> order lateral roots accounted for approximately  
699 40% and 60% of the total rhizodeposit hotspot volume around a 21 day old root  
700 system of *Vicia faba*. This was true for both citrate and mucilage. In contrast,

701 the influence of rhizodeposit overlap on the total rhizodeposit hotspot volume  
702 was found to be quite different for citrate and mucilage: while rhizodeposit over-  
703 lap accounted for 64 % of the total rhizodeposit hotspot volume of citrate, it was  
704 responsible for only 10 % of the total rhizodeposit hotspot volume of mucilage  
705 after 21 days of simulation. These differences are caused primarily by differences  
706 in the rhizodeposit release: while mucilage is deposited exclusively at the root  
707 tip, citrate release takes place over a length of approximately 5 *cm* behind the  
708 root tip. Additionally, due to the larger diffusion coefficient of citrate compared  
709 to mucilage, rhizodeposit concentration volumes around individual roots are  
710 larger for citrate than for mucilage and the possibility of rhizodeposit overlap is  
711 thus also greater for citrate than for mucilage. It must be noted that we only  
712 looked at a single root system in the present study. If multiple neighbouring  
713 root systems were considered, the impact of overlapping rhizodeposition zones  
714 on the total rhizodeposit hotspot volume would be even larger.

715 Our rhizodeposit hotspot analysis showed that rhizodeposit concentrations  
716 were above the defined thresholds only in the immediate vicinity of the root  
717 surface near root tips or near root branching zones. Around the root system of  
718 *Zea mays*, which has a lower rhizodeposit release rate per root tip than *Vicia*  
719 *faba*, rhizodeposit hotspot volumes of both citrate and mucilage were generally  
720 too small to be captured by our simulation model. Similar results were reported  
721 by Fletcher et al. (2019) and Fletcher et al. (2020) for citrate, who have shown in  
722 modelling studies that the critical concentration threshold around a root leading  
723 to enhanced phosphorus mobilization is hardly ever reached.

724 There are numerous modeling studies in the literature on root foraging  
725 strategies that use 3D root architecture models (e.g. Ge et al. (2000), Lynch  
726 (1995), and Pagès (2011)). However, all of these studies concentrated on the  
727 analysis of nutrient depletion zone overlap and did not consider the impact of  
728 overlapping rhizodeposition zones on nutrient supply. De Parseval et al. (2017)  
729 used a 2D model approach to investigate the interaction between inter-root  
730 competition and inter-root facilitation in the horizontal plane. Inter-root com-  
731 petition is caused by the overlap of nutrient depletion zones, while inter-root  
732 facilitation is based on the overlap of rhizodeposition zones, which leads to rhi-  
733 zodeposit hotspots and consequently to an increased nutrient availability. Based  
734 on the distances between roots, this model approach allowed them to predict  
735 whether competition, facilitation or no interaction is the predominant process  
736 governing root phosphorus uptake. It would be pertinent to use our model to  
737 bridge these studies and to extend previous modelling approaches on root for-  
738 aging strategies by the aspect of inter-root facilitation. This would give us a  
739 more realistic estimate about the impact of root architecture on root nutrient  
740 uptake.

## 741 5.5 Conclusion

742 In this study, we presented a new model to simulate the spatiotemporal distribu-  
743 tion patterns of rhizodeposits around growing root systems in three dimensions.  
744 The novel model approach allowed us to evaluate the effects of root architecture

745 features such as root growth rate and branching density on the development of  
746 rhizodeposit hotspot zones, which can trigger specific rhizosphere processes such  
747 as increased nutrient uptake by roots. It further enabled the investigation of  
748 the influence of differences in rhizodeposit properties and root architectures of  
749 different plant species on rhizodeposition patterns. We could show that rhizode-  
750 posit hotspot volumes around roots were at a maximum at intermediate root  
751 growth rates and that branching allowed the rhizospheres of individual roots to  
752 overlap, resulting in an increase in the volume of rhizodeposit hotspot zones.  
753 We could also show that the volume of rhizodeposit hotspots was smaller around  
754 the fibrous root system *Zea mays* than around the tap root system *Vicia faba*.

755 Further work includes the integration of our model into a 3D multi-component  
756 root and solute transport model (Mai et al., 2019). This model can then be  
757 used to mechanistically explain experimentally observed rhizodeposition pat-  
758 terns (e.g., using zymography or  $^{11}\text{CO}_2$ -labeling (Giles et al., 2018; Yin et al.,  
759 2020)). We also aim to incorporate the influence of root hairs and root diam-  
760 eters into our model to gain a better understanding of the water and nutrient  
761 acquisition strategies of different plant species.

## 762 5.6 Acknowledgements

763 This project was carried out in the framework of the priority program 2089 ‘Rhi-  
764 zosphere spatiotemporal organization – a key to rhizosphere functions’ funded  
765 by the German Research Foundation DFG under the project number 403641034.  
766 A.H. and E.K. have been funded by the German Research Foundation DFG un-  
767 der Germany’s Excellence Strategy – EXC 2070 – 390732324.

## 768 References

- 769 Ahmed, M. A., Kroener, E., Holz, M., Zarebanadkouki, M., & Carminati, A.  
770 (2014). Mucilage exudation facilitates root water uptake in dry soils.  
771 *Functional Plant Biology*, *41*(11), 1129–1137. [https://doi.org/10.1071/](https://doi.org/10.1071/FP13330)  
772 [FP13330](https://doi.org/10.1071/FP13330)
- 773 Ahmed, M. A., Kroener, E., Benard, P., Zarebanadkouki, M., Kaestner, A., &  
774 Carminati, A. (2016). Drying of mucilage causes water repellency in  
775 the rhizosphere of maize: Measurements and modelling. *Plant and Soil*,  
776 *407*(1-2), 161–171. <https://doi.org/10.1007/s11104-015-2749-1>
- 777 Albalasmeh, A. A., & Ghezzehei, T. A. (2014). Interplay between soil drying and  
778 root exudation in rhizosphere development. *Plant and Soil*, *374*(1-2),  
779 739–751. <https://doi.org/10.1007/s11104-013-1910-y>
- 780 Aulakh, M., Wassmann, R., Bueno, C., Kreuzwieser, J., & Rennenberg, H.  
781 (2001). Characterization of root exudates at different growth stages of  
782 ten rice (*Oryza sativa* L.) cultivars. *Plant biology*, *3*(2), 139–148. <https://doi.org/10.1055/s-2001-12905>
- 784 Bear, J., & Cheng, A. H.-D. (2010). *Modeling groundwater flow and contaminant*  
785 *transport* (Vol. 23). Springer Science & Business Media.

- 786 Benard, P., Zarebanadkouki, M., Brax, M., Kaltenbach, R., Jerjen, I., Marone,  
787 F., Couradeau, E., Felde, V. J., Kaestner, A., & Carminati, A. (2019).  
788 Microhydrological niches in soils: How mucilage and eps alter the bio-  
789 physical properties of the rhizosphere and other biological hotspots.  
790 *Vadose Zone Journal*, 18(1), 1–10. [https://doi.org/10.2136/vzj2018.](https://doi.org/10.2136/vzj2018.12.0211)  
791 12.0211
- 792 Carminati, A., Kroener, E., Ahmed, M. A., Zarebanadkouki, M., Holz, M., &  
793 Ghezzehei, T. (2016a). Water for carbon, carbon for water. *Vadose Zone*  
794 *Journal*, 15(2), 1–10. <https://doi.org/10.2136/vzj2015.04.0060>
- 795 Carminati, A., & Vetterlein, D. (2013). Plasticity of rhizosphere hydraulic prop-  
796 erties as a key for efficient utilization of scarce resources. *Annals of*  
797 *botany*, 112(2), 277–290. <https://doi.org/10.1093/aob/mcs262>
- 798 Carminati, A., Zarebanadkouki, M., Kroener, E., Ahmed, M. A., & Holz, M.  
799 (2016b). Biophysical rhizosphere processes affecting root water uptake.  
800 *Annals of Botany*, 118(4), 561–571. [https://doi.org/10.1093/aob/](https://doi.org/10.1093/aob/mcw113)  
801 [mcw113](https://doi.org/10.1093/aob/mcw113)
- 802 Carslaw, H., & Jaeger, J. (1959). *Conduction of heat in solids*. Clarendon Press.  
803 [https://doi.org/10.1007/978-3-319-48090-9\\_9](https://doi.org/10.1007/978-3-319-48090-9_9)
- 804 Carson, J. K., Gonzalez-Quiñones, V., Murphy, D. V., Hinz, C., Shaw, J. A.,  
805 & Gleeson, D. B. (2010). Low pore connectivity increases bacterial di-  
806 versity in soil. *Applied and environmental microbiology*, 76(12), 3936–  
807 3942. <https://doi.org/10.1128/AEM.03085-09>
- 808 Cheng, W., & Gershenson, A. (2007). Carbon fluxes in the rhizosphere. *The*  
809 *rhizosphere* (pp. 31–56). Elsevier. [https://doi.org/10.1016/B978-](https://doi.org/10.1016/B978-012088775-0/50004-5)  
810 [012088775-0/50004-5](https://doi.org/10.1016/B978-012088775-0/50004-5)
- 811 Crank, J. (1979). *The mathematics of diffusion*. Oxford university press.
- 812 Darrah, P. (1991). Models of the rhizosphere. *Plant and Soil*, 133(2), 187–199.
- 813 De Parseval, H., Barot, S., Gignoux, J., Lata, J.-C., & Raynaud, X. (2017).  
814 Modelling facilitation or competition within a root system: Importance  
815 of the overlap of root depletion and accumulation zones. *Plant and soil*,  
816 419(1-2), 97–111. <https://doi.org/10.1007/s11104-017-3321-y>
- 817 Evans, L. C. (1998). Partial differential equations. *Graduate studies in mathe-*  
818 *matics*, 19(2).
- 819 Fletcher, D. M., Ruiz, S., Dias, T., Petroselli, C., & Roose, T. (2020). Linking  
820 root structure to functionality: The impact of root system architecture  
821 on citrate-enhanced phosphate uptake. *New Phytologist*, 227(2), 376–  
822 391. <https://doi.org/10.1111/nph.16554>
- 823 Fletcher, D. M., Shaw, R., Sánchez-Rodríguez, A., Daly, K., Van Veelen, A.,  
824 Jones, D., & Roose, T. (2019). Quantifying citrate-enhanced phosphate  
825 root uptake using microdialysis. *Plant and Soil*, 1–21. [https://doi.org/](https://doi.org/10.1007/s11104-019-04376-4)  
826 [10.1007/s11104-019-04376-4](https://doi.org/10.1007/s11104-019-04376-4)
- 827 Gao, W., Blaser, S. R., Schlüter, S., Shen, J., & Vetterlein, D. (2019). Effect  
828 of localised phosphorus application on root growth and soil nutrient  
829 dynamics in situ—comparison of maize (*zea mays*) and faba bean (*vicia*  
830 *faba*) at the seedling stage. *Plant and Soil*, 441(1-2), 469–483. <https://doi.org/10.1007/s11104-019-04138-2>  
831

- 832 Ge, Z., Rubio, G., & Lynch, J. P. (2000). The importance of root gravitropism  
833 for inter-root competition and phosphorus acquisition efficiency: Results  
834 from a geometric simulation model. *Plant and soil*, *218*(1-2), 159–171.  
835 <https://doi.org/10.1023/A:1014987710937>
- 836 Gerke, J. (2015). The acquisition of phosphate by higher plants: Effect of car-  
837 boxylate release by the roots. a critical review. *Journal of Plant Nutri-  
838 tion and Soil Science*, *178*(3), 351–364. [https://doi.org/10.1002/jpln.  
839 201400590](https://doi.org/10.1002/jpln.201400590)
- 840 Giles, C., Dupuy, L., Boitt, G., Brown, L., Condron, L., Darch, T., Blackwell,  
841 M., Menezes-Blackburn, D., Shand, C., Stutter, M., et al. (2018). Root  
842 development impacts on the distribution of phosphatase activity: Im-  
843 provements in quantification using soil zymography. *Soil Biology and  
844 Biochemistry*, *116*, 158–166. [https://doi.org/10.1016/j.soilbio.2017.08.  
845 011](https://doi.org/10.1016/j.soilbio.2017.08.011)
- 846 Gransee, A., & Wittenmayer, L. (2000). Qualitative and quantitative analy-  
847 sis of water-soluble root exudates in relation to plant species and de-  
848 velopment. *Journal of plant nutrition and soil science*, *163*(4), 381–  
849 385. [https://doi.org/10.1002/1522-2624\(200008\)163:4<381::AID-  
850 JPLN381>3.0.CO;2-7](https://doi.org/10.1002/1522-2624(200008)163:4<381::AID-JPLN381>3.0.CO;2-7)
- 851 Hinsinger, P., Bengough, A. G., Vetterlein, D., & Young, I. M. (2009). Rhizo-  
852 sphere: Biophysics, biogeochemistry and ecological relevance. *Plant and  
853 soil*, *321*(1-2), 117–152. <https://doi.org/10.1007/s11104-008-9885-9>
- 854 Hodge, A., Berta, G., Doussan, C., Merchan, F., & Crespi, M. (2009). Plant  
855 root growth, architecture and function. *Plant and soil*, *321*(1-2), 153–  
856 187. <https://doi.org/10.1007/s11104-009-9929-9>
- 857 Holz, M., Leue, M., Ahmed, M. A., Benard, P., Gerke, H. H., & Carminati, A.  
858 (2018a). Spatial distribution of mucilage in the rhizosphere measured  
859 with infrared spectroscopy. *Frontiers in Environmental Science*, *6*, 87.  
860 <https://doi.org/10.3389/fenvs.2018.00087>
- 861 Holz, M., Zarebanadkouki, M., Kaestner, A., Kuzyakov, Y., & Carminati, A.  
862 (2018b). Rhizodeposition under drought is controlled by root growth  
863 rate and rhizosphere water content. *Plant and soil*, *423*(1-2), 429–442.  
864 <https://doi.org/10.1007/s11104-017-3522-4>
- 865 Iijima, M., Sako, Y., & Rao, T. (2003). A new approach for the quantification of  
866 root-cap mucilage exudation in the soil. *Roots: The dynamic interface  
867 between plants and the earth* (pp. 399–407). Springer. [https://doi.org/  
868 10.1023/A:1026183109329](https://doi.org/10.1023/A:1026183109329)
- 869 Jacques, D., Šimnek, J., Mallants, D., & Van Genuchten, M. T. (2018). The  
870 hpx software for multicomponent reactive transport during variably-  
871 saturated flow: Recent developments and applications. *Journal of Hy-  
872 drology and Hydromechanics*, *66*(2), 211–226. [https://doi.org/10.1515/  
873 johh-2017-0049](https://doi.org/10.1515/johh-2017-0049)
- 874 Jones, D. L. (1998). Organic acids in the rhizosphere—a critical review. *Plant  
875 and soil*, *205*(1), 25–44. <https://doi.org/10.1023/A:1004356007312>

- 876 Kirk, G. D. (1999). A model of phosphate solubilization by organic anion ex-  
877 cretion from plant roots. *European Journal of Soil Science*, 50(3), 369–  
878 378. <https://doi.org/10.1111/j.1365-2389.1999.00239.x>
- 879 Krasil'nikov, N. et al. (1958). Soil microorganisms and higher plants. *Soil mi-*  
880 *croorganisms and higher plants*.
- 881 Kuzyakov, Y., Raskatov, A., & Kaupenjohann, M. (2003). Turnover and distri-  
882 bution of root exudates of zea mays. *Plant and Soil*, 254(2), 317–327.  
883 <https://doi.org/10.1023/A:1025515708093>
- 884 Lobet, G., Pound, M. P., Diener, J., Pradal, C., Draye, X., Godin, C., Javaux,  
885 M., Leitner, D., Meunier, F., Nacry, P., et al. (2015). Root system  
886 markup language: Toward a unified root architecture description lan-  
887 guage. *Plant Physiology*, 167(3), 617–627. [https://doi.org/10.1104/pp.](https://doi.org/10.1104/pp.114.253625)  
888 114.253625
- 889 Lynch, J. (1995). Root architecture and plant productivity. *Plant physiology*,  
890 109(1), 7. <https://doi.org/10.1104/pp.109.1.7>
- 891 Lynch, J. P., Ho, M. D. et al. (2005). Rhizoeconomics: Carbon costs of phos-  
892 phorus acquisition. *Plant and soil*, 269(1-2), 45–56. [https://doi.org/10.](https://doi.org/10.1007/s11104-004-1096-4)  
893 1007/s11104-004-1096-4
- 894 Lyu, Y., Tang, H., Li, H., Zhang, F., Rengel, Z., Whalley, W. R., & Shen, J.  
895 (2016). Major crop species show differential balance between root mor-  
896 phological and physiological responses to variable phosphorus supply.  
897 *Frontiers in Plant Science*, 7, 1939. [https://doi.org/10.3389/fpls.2016.](https://doi.org/10.3389/fpls.2016.01939)  
898 01939
- 899 Mai, T. H., Schnepf, A., Vereecken, H., & Vanderborght, J. (2019). Contin-  
900 uum multiscale model of root water and nutrient uptake from soil with  
901 explicit consideration of the 3d root architecture and the rhizosphere  
902 gradients. *Plant and Soil*, 439(1-2), 273–292. [https://doi.org/10.1007/](https://doi.org/10.1007/s11104-018-3890-4)  
903 s11104-018-3890-4
- 904 Manschadi, A. M., Kaul, H.-P., Vollmann, J., Eitzinger, J., & Wenzel, W. (2014).  
905 Developing phosphorus-efficient crop varieties—an interdisciplinary re-  
906 search framework. *Field Crops Research*, 162, 87–98. [https://doi.org/](https://doi.org/10.1016/j.fcr.2013.12.016)  
907 10.1016/j.fcr.2013.12.016
- 908 Materechera, S., Dexter, A., & Alston, A. M. (1991). Penetration of very strong  
909 soils by seedling roots of different plant species. *Plant and soil*, 135(1),  
910 31–41. <https://doi.org/10.1007/BF00014776>
- 911 Moradi, A. B., Carminati, A., Vetterlein, D., Vontobel, P., Lehmann, E., Weller,  
912 U., Hopmans, J. W., Vogel, H.-J., & Oswald, S. E. (2011). Three-  
913 dimensional visualization and quantification of water content in the  
914 rhizosphere. *New Phytologist*, 192(3), 653–663. [https://doi.org/10.](https://doi.org/10.1111/j.1469-8137.2011.03826.x)  
915 1111/j.1469-8137.2011.03826.x
- 916 Nguyen, C. (2009). Rhizodeposition of organic c by plant: Mechanisms and  
917 controls. *Sustainable agriculture* (pp. 97–123). Springer. [https://doi.](https://doi.org/10.1007/978-90-481-2666-8_9)  
918 org/10.1007/978-90-481-2666-8\_9
- 919 Nguyen, C., Froux, F., Recous, S., Morvan, T., & Robin, C. (2008). Net n im-  
920 mobilisation during the biodegradation of mucilage in soil as affected by

- 921 repeated mineral and organic fertilisation. *Nutrient Cycling in Agroecosystems*, 80(1), 39–47. <https://doi.org/10.1007/s10705-007-9119-1>
- 922
- 923 Nielsen, K. L., Lynch, J. P., Jablokow, A. G., & Curtis, P. S. (1994). Carbon  
924 cost of root systems: An architectural approach. *Plant and Soil*, 165(1),  
925 161–169. <https://doi.org/10.1007/BF00009972>
- 926 Nye, P. (1966). The effect of the nutrient intensity and buffering power of a  
927 soil, and the absorbing power, size and root hairs of a root, on nutrient  
928 absorption by diffusion. *Plant and Soil*, 25(1), 81–105. <https://doi.org/10.1007/BF01347964>
- 929
- 930 Oburger, E., Jones, D. L., & Wenzel, W. W. (2011). Phosphorus saturation and  
931 pH differentially regulate the efficiency of organic acid anion-mediated  
932 p solubilization mechanisms in soil. *Plant and Soil*, 341(1-2), 363–382.  
933 <https://doi.org/10.1007/s11104-010-0650-5>
- 934 Olesen, T., Moldrup, P., Yamaguchi, T., & Rolston, D. (2001). Constant slope  
935 impedance factor model for predicting the solute diffusion coefficient in  
936 unsaturated soil. *Soil Science*, 166(2), 89–96. <https://doi.org/10.1097/00010694-200102000-00002>
- 937
- 938 Ollion, J., Cochenec, J., Loll, F., Escudé, C., & Boudier, T. (2013). Tango: A  
939 generic tool for high-throughput 3d image analysis for studying nuclear  
940 organization. *Bioinformatics*, 29(14), 1840–1841. <https://doi.org/10.1093/bioinformatics/btt276>
- 941
- 942 Or, D., Phutane, S., & Dechesne, A. (2007). Extracellular polymeric substances  
943 affecting pore-scale hydrologic conditions for bacterial activity in un-  
944 saturated soils. *Vadose Zone Journal*, 6(2), 298–305. <https://doi.org/10.2136/vzj2006.0080>
- 945
- 946 Pagès, L. (2011). Links between root developmental traits and foraging perfor-  
947 mance. *Plant, Cell & Environment*, 34(10), 1749–1760.
- 948 Pausch, J., Tian, J., Riederer, M., & Kuzyakov, Y. (2013). Estimation of rhi-  
949 zodeposition at field scale: Upscaling of a <sup>14</sup>C labeling study. *Plant and*  
950 *Soil*, 364(1-2), 273–285. <https://doi.org/10.1007/s11104-012-1363-8>
- 951 Pineros, M. A., Magalhaes, J. V., Alves, V. M. C., & Kochian, L. V. (2002).  
952 The physiology and biophysics of an aluminum tolerance mechanism  
953 based on root citrate exudation in maize. *Plant Physiology*, 129(3),  
954 1194–1206. <https://doi.org/10.1104/pp.002295>
- 955 Rangel, A. F., Rao, I. M., Braun, H.-P., & Horst, W. J. (2010). Aluminum re-  
956 sistance in common bean (*Phaseolus vulgaris*) involves induction and  
957 maintenance of citrate exudation from root apices. *Physiologia Plan-*  
958 *tarum*, 138(2), 176–190. <https://doi.org/10.1111/j.1399-3054.2009.01303.x>
- 959
- 960 Schindelin, J., Arganda-Carreras, I., Frise, E., Kaynig, V., Longair, M., Pietzsch,  
961 T., Preibisch, S., Rueden, C., Saalfeld, S., Schmid, B., et al. (2012). Fiji:  
962 An open-source platform for biological-image analysis. *Nature methods*,  
963 9(7), 676–682. <https://doi.org/10.1038/nmeth.2019>
- 964 Schnepf, A., Leitner, D., & Klepsch, S. (2012). Modeling phosphorus uptake  
965 by a growing and exuding root system. *Vadose Zone Journal*, 11(3),  
966 vzj2012-0001. <https://doi.org/10.2136/vzj2012.0001>

- 967 Schnepf, A., Leitner, D., Landl, M., Lobet, G., Mai, T. H., Morandage, S., Sheng,  
968 C., Zörner, M., Vanderborght, J., & Vereecken, H. (2018). Crootbox: A  
969 structural–functional modelling framework for root systems. *Annals of*  
970 *botany*, *121*(5), 1033–1053. <https://doi.org/10.1093/aob/mcx221>
- 971 Schulz-Bohm, K., Geisen, S., Wubs, E. J., Song, C., de Boer, W., & Garbeva,  
972 P. (2017). The prey’s scent–volatile organic compound mediated inter-  
973 actions between soil bacteria and their protist predators. *The ISME*  
974 *journal*, *11*(3), 817–820. <https://doi.org/10.1038/ismej.2016.144>
- 975 Sealey, L., McCully, M., & Canny, M. (1995). The expansion of maize root-cap  
976 mucilage during hydration. 1. kinetics. *Physiologia Plantarum*, *93*(1),  
977 38–46. <https://doi.org/10.1034/j.1399-3054.1995.930107.x>
- 978 Segal, E., Kushnir, T., Mualem, Y., & Shani, U. (2008). Water uptake and  
979 hydraulics of the root hair rhizosphere. *Vadose Zone Journal*, *7*(3),  
980 1027–1034. <https://doi.org/10.2136/vzj2007.0122>
- 981 Stingaciu, L., Schulz, H., Pohlmeier, A., Behnke, S., Zilken, H., Javaux, M., &  
982 Vereecken, H. (2013). In situ root system architecture extraction from  
983 magnetic resonance imaging for water uptake modeling. *Vadose zone*  
984 *journal*, *12*(1), 1–9. <https://doi.org/10.2136/vzj2012.0019>
- 985 Watt, M., Silk, W. K., & Passioura, J. B. (2006). Rates of root and organism  
986 growth, soil conditions, and temporal and spatial development of the  
987 rhizosphere. *Annals of botany*, *97*(5), 839–855. [https://doi.org/10.](https://doi.org/10.1093/aob/mcl028)  
988 [1093/aob/mcl028](https://doi.org/10.1093/aob/mcl028)
- 989 Westhoff, S., van Wezel, G. P., & Rozen, D. E. (2017). Distance-dependent  
990 danger responses in bacteria. *Current opinion in microbiology*, *36*, 95–  
991 101. <https://doi.org/10.1016/j.mib.2017.02.002>
- 992 Wilson, J. L., & Miller, P. J. (1978). Two-dimensional plume in uniform ground-  
993 water flow. *Journal of the Hydraulics Division*, *104*(4), 503–514. <https://doi.org/10.1061/JYCEAJ.0004975>
- 994 Yin, Y.-G., Suzui, N., Kurita, K., Miyoshi, Y., Unno, Y., Fujimaki, S., Naka-  
995 mura, T., Shinano, T., & Kawachi, N. (2020). Visualising spatio-temporal  
996 distributions of assimilated carbon translocation and release in root  
997 systems of leguminous plants. *Scientific reports*, *10*(1), 1–11. <https://doi.org/10.1038/s41598-020-65668-9>
- 1000 Zhou, X.-R., Schnepf, A., Vanderborght, J., Leitner, D., Lacoïnte, A., Vereecken,  
1001 H., & Lobet, G. (2020). Cplantbox, a whole-plant modelling frame-  
1002 work for the simulation of water-and carbon-related processes. *in silico*  
1003 *Plants*, *2*(1), diaa001. <https://doi.org/10.1093/insilicoplants/diaa001>
- 1004 Zickenrott, I.-M., Woche, S. K., Bachmann, J., Ahmed, M. A., & Vetterlein,  
1005 D. (2016). An efficient method for the collection of root mucilage from  
1006 different plant species—a case study on the effect of mucilage on soil  
1007 water repellency. *Journal of Plant Nutrition and Soil Science*, *179*(2),  
1008 294–302. <https://doi.org/10.1002/jpln.201500511>
